# Supplementary material for: Covalent Decoration of Cortical Membranes with Graphene Oxide as a Substrate for Dental Pulp Stem Cells
Source: Nanomaterials (Basel). 2019 Apr 12;9(4):604. doi: 10.3390/nano9040604 (PMC6523176; doi:10.3390/nano9040604)
Supplement: Supplementary file 1 [file nanomaterials-09-00604-s001.pdf]

# Covalent decoration of cortical membranes with graphene oxide as a substrate for Dental Pulp Stem cells

Roberta Di Carlo <sup>1,†</sup>, Susi Zara <sup>1,†</sup>, Alessia Ventrella <sup>1,†</sup>, Gabriella Siani <sup>1</sup>, Tatiana Da Ros <sup>2</sup>, Giovanna Iezzi <sup>3</sup>, Amelia Cataldi <sup>1</sup> and Antonella Fontana <sup>1,\*</sup>

<sup>1</sup> Department of Pharmacy, University "G. d'Annunzio", Via dei Vestini, 66100 Chieti, Italy

<sup>2</sup> Department of Chemical and Pharmaceutical Sciences, University of Trieste. Piazzale Europa 1, 34127 Trieste, Italy

<sup>3</sup> Department of Medical, Oral and Biotechnological Sciences, University "G. d'Annunzio", Via dei Vestini, 66100 Chieti, Italy

\* Correspondence: fontana@unich.it; Tel.: +39 0871 3554790

† These Authors contributed equally.

## SUPPORTING INFORMATION

**S1. Morphology of DSPCs**

**S2. Original AFM data for the mechanical studies**

## S1. Morphology of DPSCs

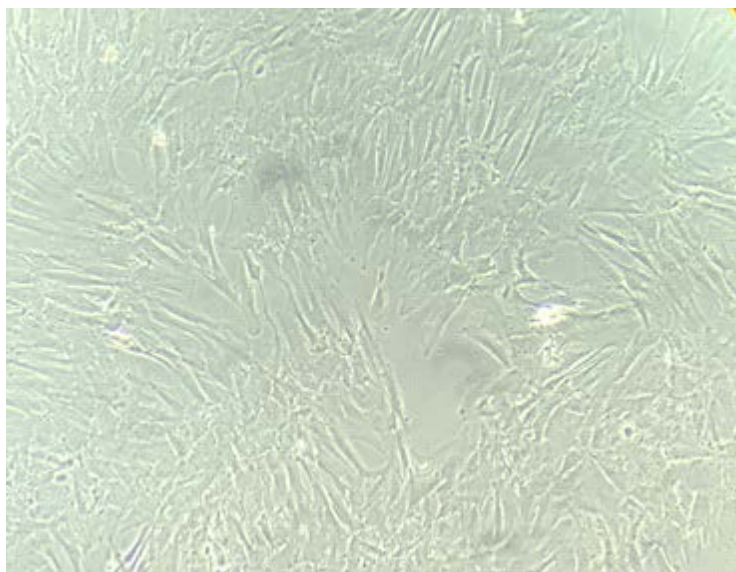

**Figure S1.** DPSCs observed with a light microscope before detachment and seeding for osteoblastic differentiation. Magnification 10×.

## S2. Original AFM data used for the mechanical studies

### S2.1 Original AFM micrograph of pure Lamina used for the mechanical studies

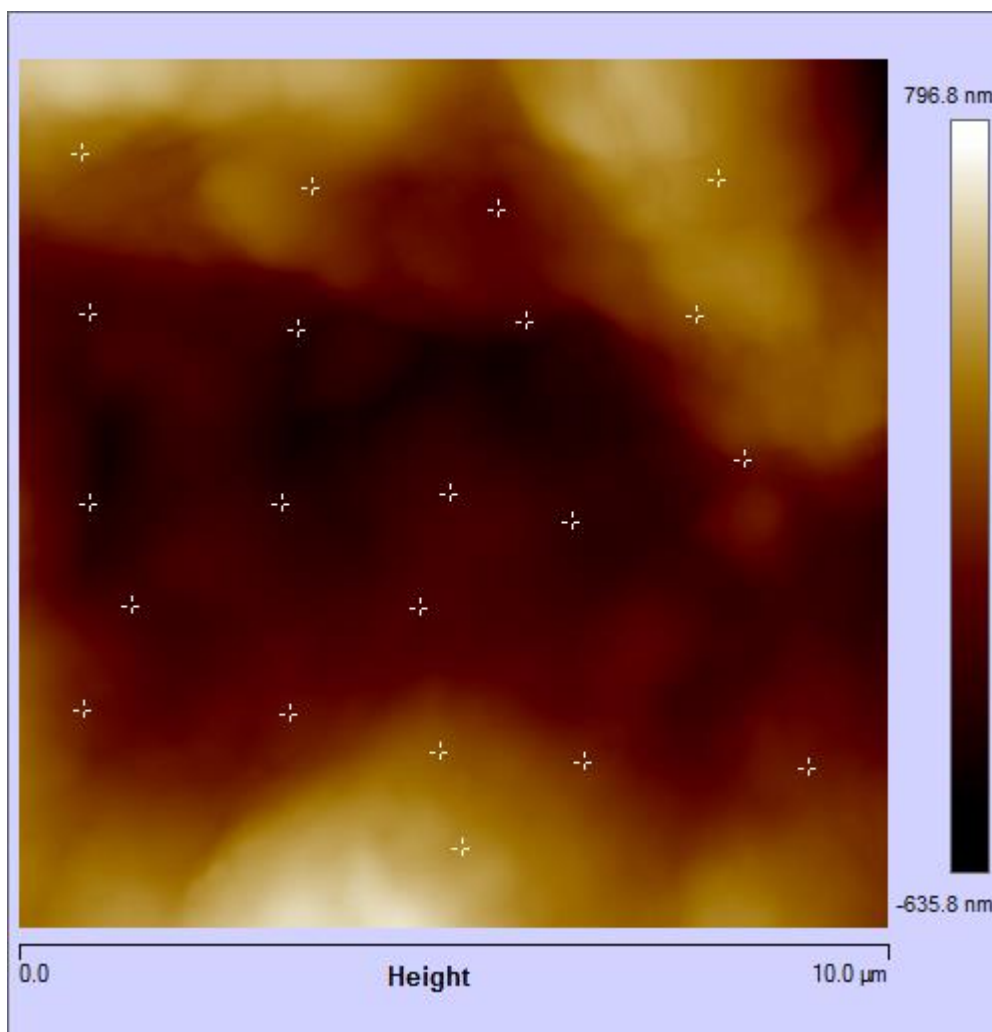

**Figure S2.** AFM micrograph of topographical height of pure Lamina indicating the points where the force curve has been extracted and used for the calculation of the Young's Modulus.

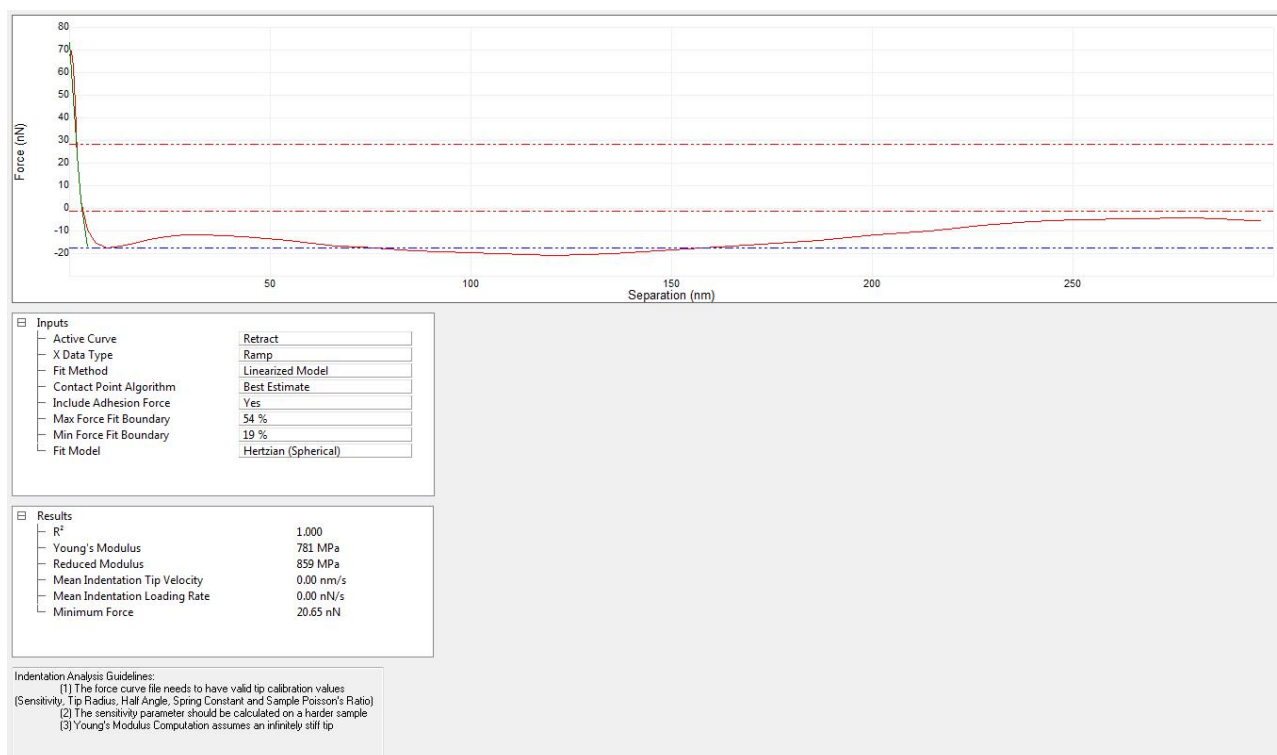

**Figure S3.** Representative Force Curve and corresponding Young's modulus calculation for pure Lamina. The final value is the average value among 21 data.

*S2.2 Original AFM micrograph of Lamina enriched with 5  $\mu\text{g/mL}$  GO used for the mechanical studies*

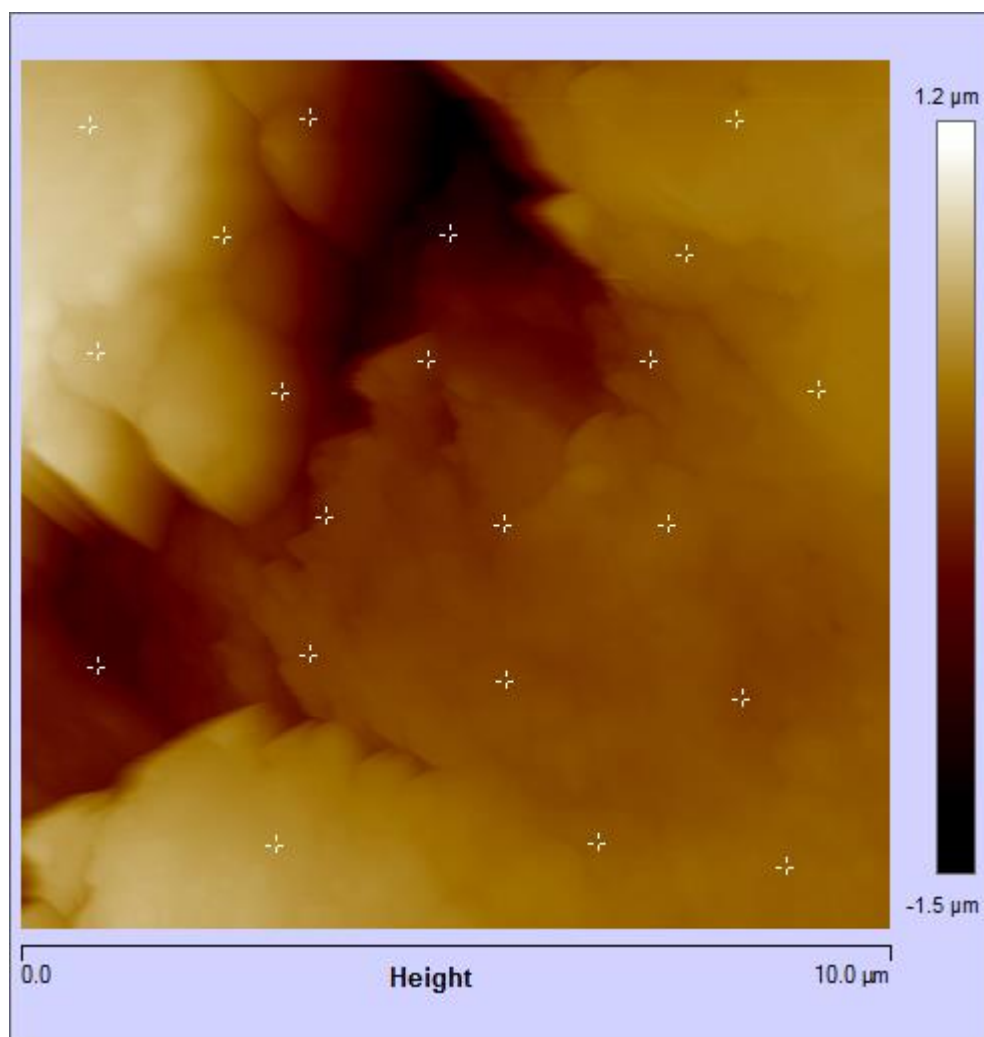

**Figure S4.** AFM micrograph of topographical height of Lamina enriched with 5  $\mu\text{g/mL}$  GO indicating the points where the force curve has been extracted and used for the calculation of the Young's Modulus.

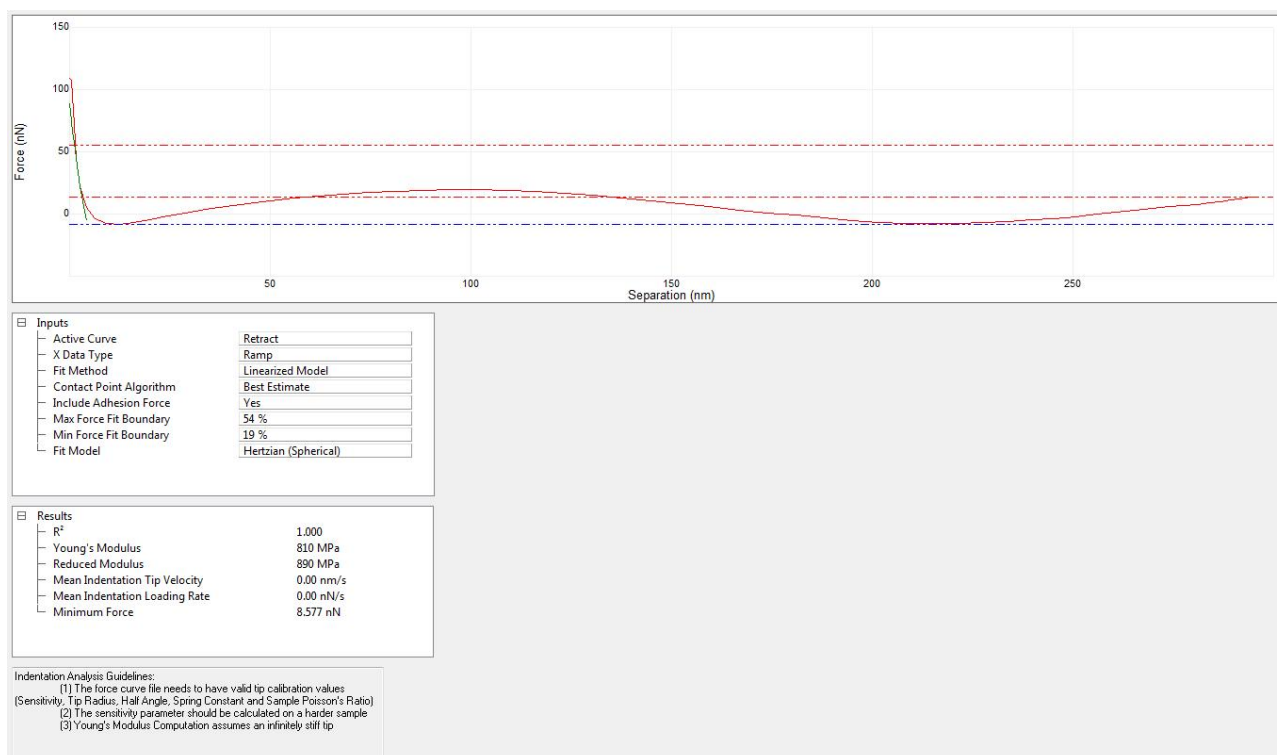

**Figure S5.** Representative Force Curve and corresponding Young's modulus calculation for Lamina enriched with 5  $\mu\text{g/mL}$  GO. The final value is the average value among 21 data.

*S2.3 Original AFM micrograph of Lamina enriched with 10  $\mu\text{g/mL}$  GO used for the mechanical studies*

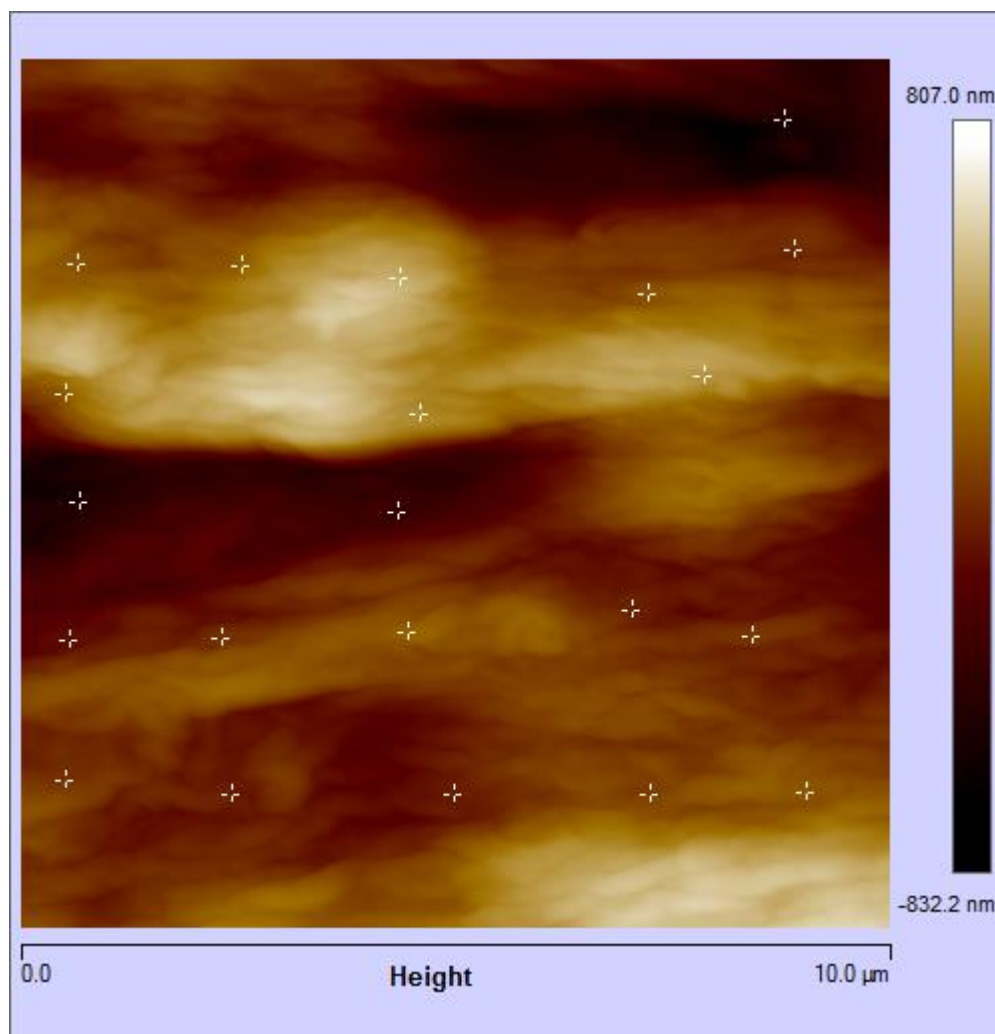

**Figure S6.** AFM micrograph of topographical height of Lamina enriched with 10  $\mu\text{g/mL}$  GO indicating the points where the force curve has been extracted and used for the calculation of the Young's Modulus.

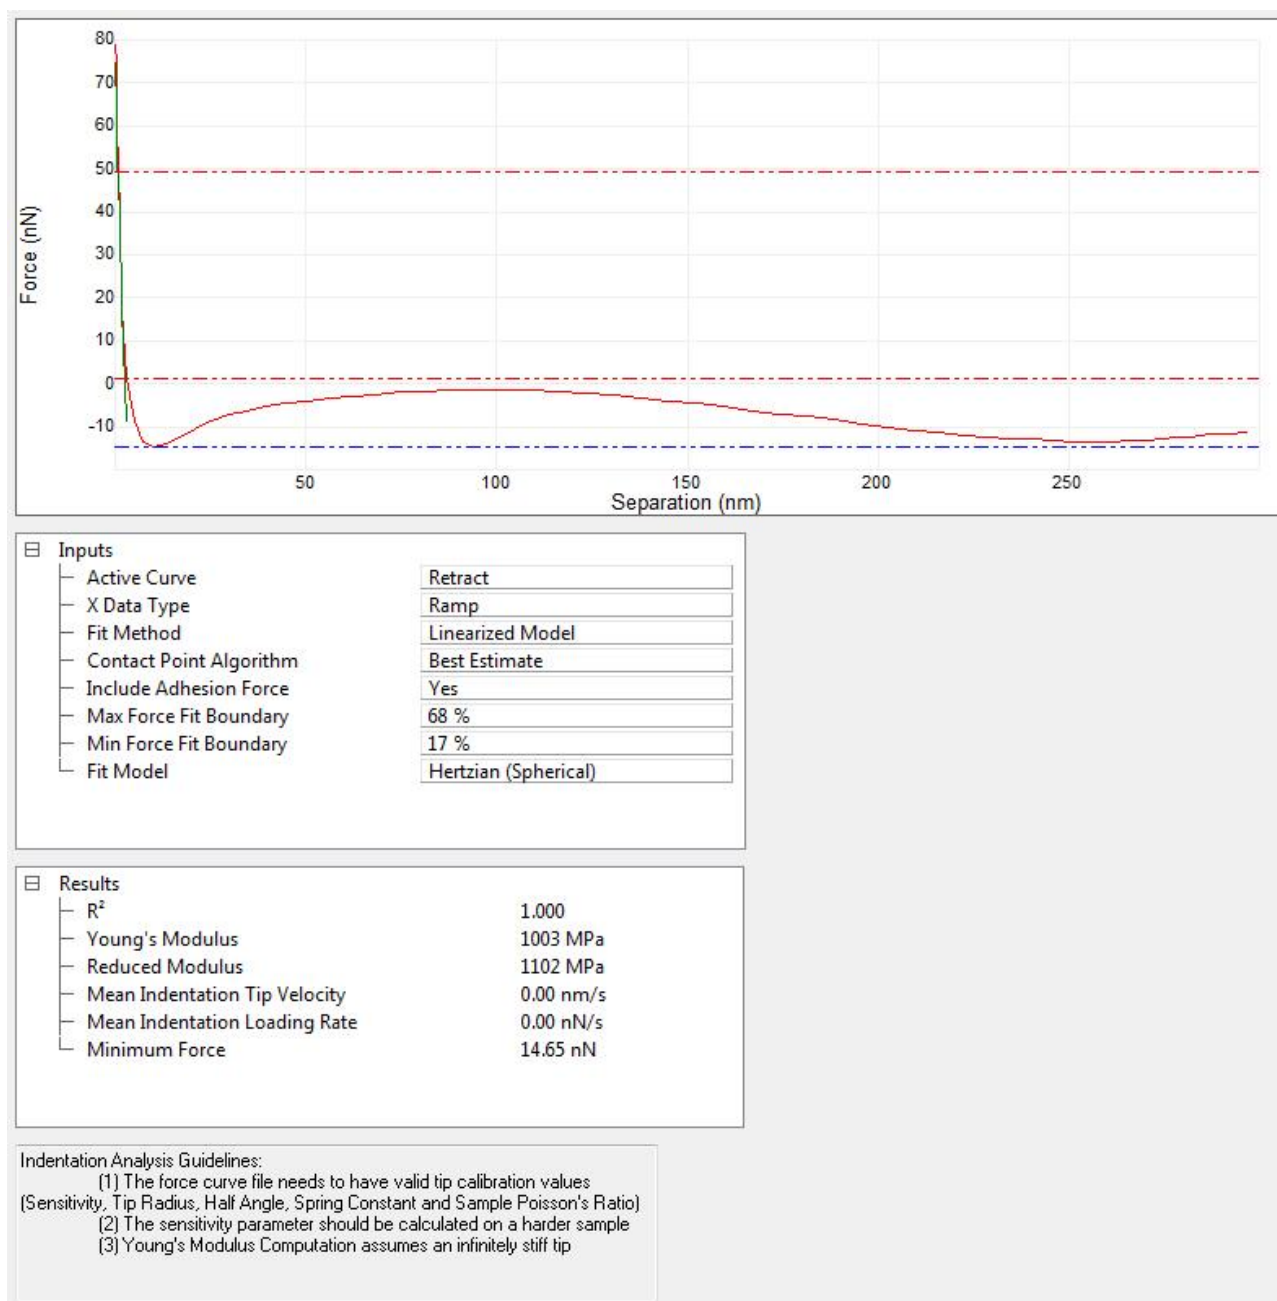

**Figure S7.** Representative Force Curve and corresponding Young's modulus calculation for Lamina enriched with 10  $\mu\text{g/mL}$  GO. The final value is the average value among 22 data.

#### S2.4 Original AFM micrographs used for the roughness index calculation

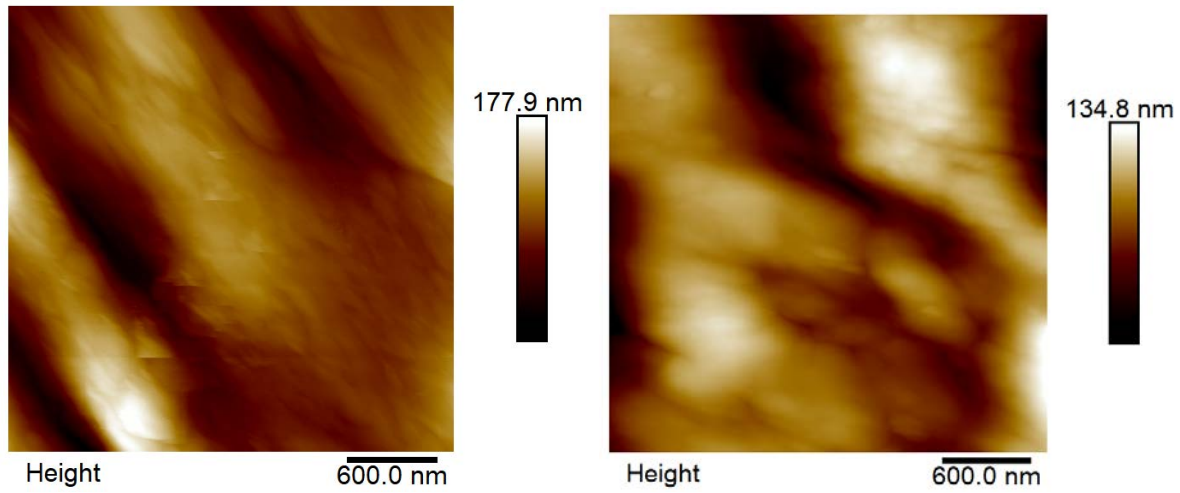

**Figure S8.** Height panels of bare Lamina sample used for the calculation of roughness indexes.

**Table S1.** Roughness indexes recovered from Panels of Figure S8 for bare Lamina sample.

| Roughness recovered | Ra      | Rq      | Rmax   | Sdq    | Sdr    |
|---------------------|---------|---------|--------|--------|--------|
| Panel 2             | 36.7 nm | 45.8 nm | 241 nm | 13.8 ° | 2.86 % |
| Panel 2             | 49.9 nm | 60.3 nm | 270 nm | 11.6 ° | 2.09 % |

#### S2.5 Original AFM micrographs of Lamina enriched with 5 $\mu\text{g/mL}$ GO used for the roughness indexes calculation

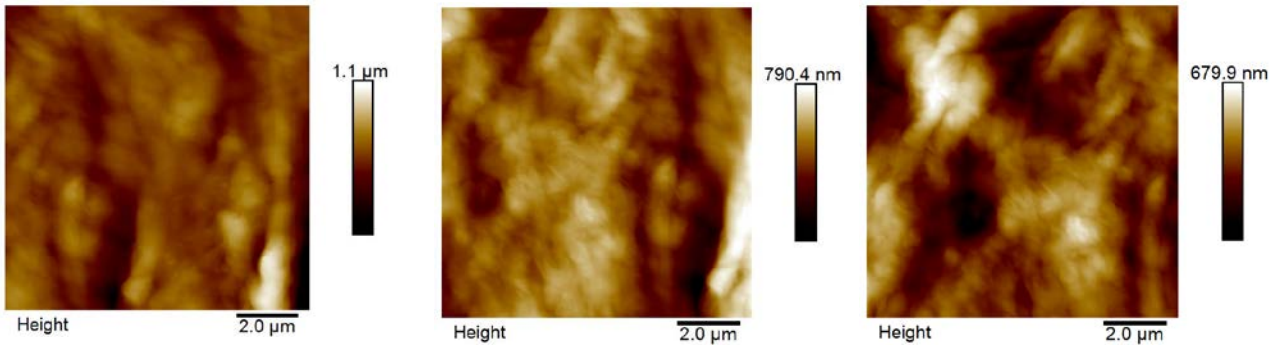

**Figure S9.** Height panels of bare Lamina enriched with 5  $\mu\text{g/mL}$  GO sample used for the calculation of roughness indexes.

**Table S2.** Roughness indexes recovered from Panels of Figure S9 for Lamina enriched with 5  $\mu\text{g/mL}$  GO sample.

| Roughness recovered | Ra     | Rq     | Rmax    | Sdq    | Sdr    |
|---------------------|--------|--------|---------|--------|--------|
| Panel 1             | 159 nm | 200 nm | 1239 nm | 23.4 ° | 8.32 % |
| Panel 2             | 166 nm | 208 nm | 1257 nm | 20.7 ° | 6.72 % |
| Panel 3             | 200 nm | 240 nm | 1414 nm | 20.1 ° | 6.44 % |

S2.6 Original AFM micrographs of Laminas enriched with 5  $\mu\text{g/mL}$  GO used for the roughness indexes calculation

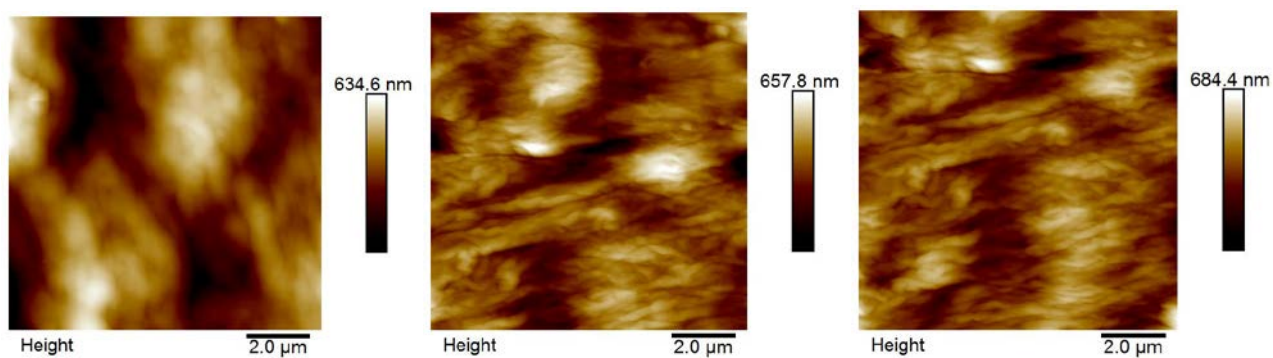

**Figure S10.** Height panels of bare Laminas enriched with 10  $\mu\text{g/mL}$  GO sample used for the calculation of roughness indexes.

**Table S3.** Roughness indexes recovered from Panels of Figure S10 for Lamina enriched with 10  $\mu\text{g/mL}$  GO sample.

| Roughness recovered | Ra     | Rq     | Rmax    | Sdq    | Sdr    |
|---------------------|--------|--------|---------|--------|--------|
| Panel 1             | 169 nm | 206 nm | 996 nm  | 13.3 ° | 2.72 % |
| Panel 2             | 258 nm | 316 nm | 1540 nm | 32.3 ° | 16.1 % |
| Panel 3             | 190 nm | 242 nm | 1397 nm | 32.1 ° | 15.8 % |
